# Supplementary material
Source: MDPI journal article supplement (https://www.mdpi.com/1999-4907/5/2/347)
Supplement: s1 [file s1]

Supplementary

**Figure S1.** SNP ranking for effect sizes on gall score after analysis with BayesCπ for the one gall and 10 gall tests. The percentage of phenotypic variance >0.2% that was explained by each SNP and confidence intervals obtained after association analysis in BAMD are presented. SNPs connected by a line correspond to SNPs significant for both inocula.


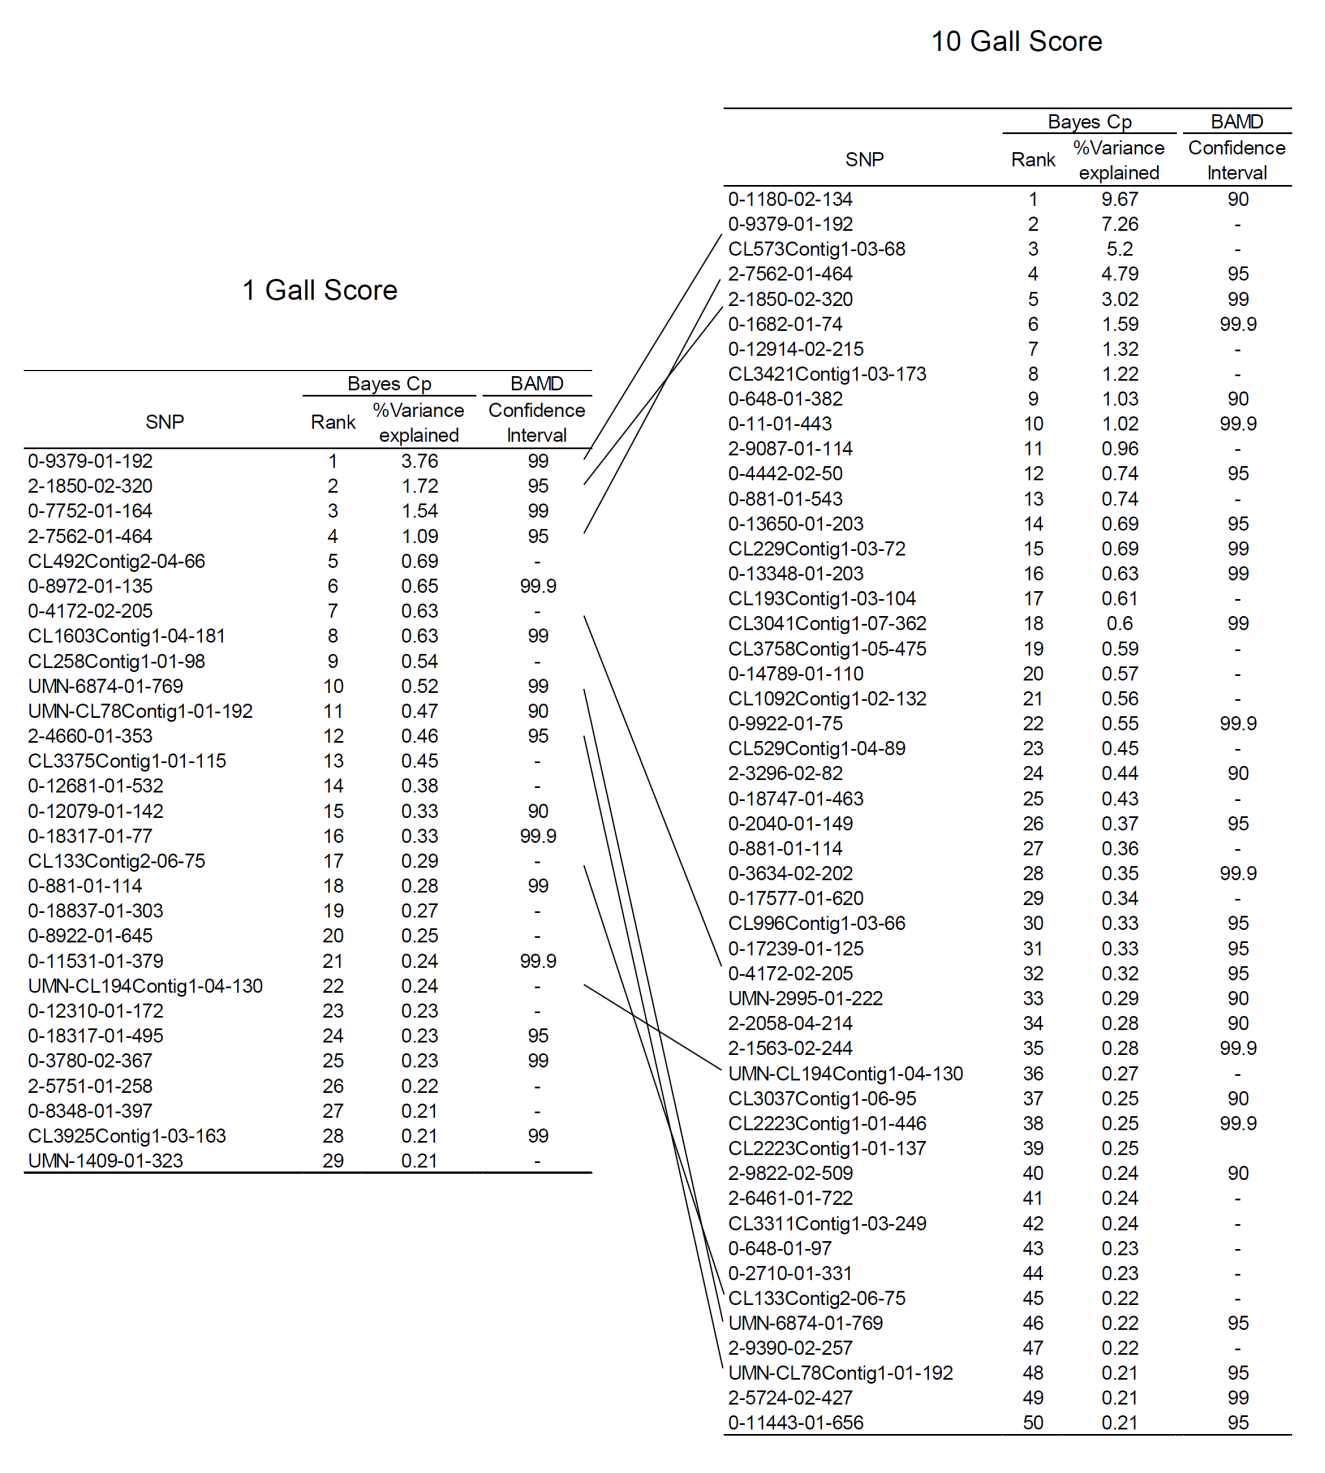


**Figure S2.** SNP ranking after analysis with Bayes Cπ for the one gall and 10 gall length tests. Percentage of phenotypic variance explained by each SNP with over 0.2% variance, and confidence intervals obtained after association analysis in BAMD. No SNPs were significantly associated with length in both inoculation tests.

**Table S1.** LOD score summary of each parent after single marker regression analyses in the one gall and 10 gall datasets. The source of the inoculum inferred to be avirulent (using LOD > 4 as a threshold) to the segregating *Fr* gene is presented, along with the linkage group (LG), if known, using standard linkage group assignments for loblolly pine [19].

| **Parent** | **Families** | **Avr source** | **Significant SNP**  **(LOD score 1gall / 10 gall)** | **LG** | **Genetic interpretation** |
| --- | --- | --- | --- | --- | --- |
| 1 | 406, 416, 434, 445 | - | - | - | No avirulence to segregating *Fr* gene. |
| 2 | 406, 412, 423, 433, 435, 454, 469 | 1 Gall | 2-1850-02-320  (6.36 / 1.12) | - | LG2 data suggest segregation for non-*Fr1* linked to *Fr1* (1 gall avirulent).  LG11 data suggest segregation for non-*Fr10* linked to *Fr10* (1 and 10 gall avirulent). |
| 1 Gall | UMN-CL78Contig1-01-192  (6.55 / 1.88) | 2 |
| 1 Gall / 10 Gall | 0-2040-01-149  (6.84 / 5.24) | 11 |
| 3 | 423, 434, 437, 458, 473 | - | - | - | No avirulence to segregating *Fr* gene. |
| 4 | 415, 437, 469 | 1 Gall | 0-881-01-114  (6.32 / 1.50) | - | LG5 data suggest segregation for a new *Fr* gene on LG5 (10 gall avirulent).  LG11 associations appear due to family 469 (shared with parent 2). |
| 1 Gall/ 10 Gall | 2-1850-02-320  (6.30 / 5.68) | - |

**Table 1.** *Cont*.

| **Parent** | | **Families** | | **Avr source** | **Significant SNP**  **(LOD score 1gall / 10 gall)** | **LG** | **Genetic interpretation** |
| --- | --- | --- | --- | --- | --- | --- | --- |
|  | |  | | 10 Gall | 2-5724-02-427  (0.20 / 5.31) | 5 |  |
| 1 Gall | 0-7752-01-164  (5.40 / 0.55) | 11 |
| 10 Gall | 0-13348-01-203  (2.72 / 7.01) | 11 |
| 5 | | 410, 411, 439, 441, 458 | | 10 Gall | 0-9379-01-192  (3.73 / 6.64) | - | LG8 data suggest segregation for a new *Fr* gene on LG8. |
| 1 Gall | UMN-6874-01-769  (6.09 / -0.45) | 8 |
| 6 | | 407, 410, 415, 450, 464, 471 | | 10 Gall | 0-881-01-114  (3.12 / 4.25) | - | High LOD scores indicate linkage to *Fr* gene(s), but none of the SNPs have been mapped. |
| 1 Gall / 10 Gall | 0-9379-01-192  (7.2 / 25.23) | - |
| 10 Gall | 0-1682-01-74  (3.75 / 21.86) | - |
| 7 | | 411, 440, 445, 456, 464 | | 10 Gall | 0-9379-01-192  (3.07 / 4.54) | - | LOD scores imply potential linkage to *Fr* gene(s), but none of the SNPs have been mapped. |
| 8 | | 425, 426, 448, 450, 456 | | 1 Gall / 10 Gall | 0-9379-01-192  (10.72 / 14.96) | - | High LOD scores indicate linkage to *Fr* gene(s), but none of the SNPs have been mapped. |
| 9 | 426, 440, 449 | - | | - | - | No avirulence to segregating *Fr* gene. |
| 10 | 425, 444, 449 | 1 Gall | | 0-9379-01-192  (4.79 / 2.34) | - | LOD scores imply potential linkage to *Fr* gene(s), but none of the SNPs have been mapped. |
| 10 Gall | | 0-4442-02-50  (0.79 / 4.29) | - |
| 11 | 427, 428, 439, 444 | 10 Gall | | 0-4442-02-50  (-0.44 / 4.02) | - | LOD scores imply potential linkage to *Fr* gene(s), but none of the SNPs have been mapped. |
| 12 | 419, 428, 446, 466, 472 | 1 Gall / 10 Gall | | 0-9379-01-192  (4.75 / 8.99) | - | LG2 data suggest segregation of *Fr1*, or a different *Fr* linked to *Fr1* (1 and 10 gall avirulent) |
| 1 Gall / 10 Gall | | UMN-CL78Contig1-01-192 (5.55 / 4.70) | 2 |
| 13 | 419, 435, 441, 465, 468 | - | | - | - | No avirulence to segregating *Fr* gene. |
| 14 | 446, 465, 470 | - | | - | - | No avirulence to segregating *Fr* gene. |
| 15 | 407, 436, 438, 468 | - | | - | - | No avirulence to segregating *Fr* gene. |

**Table 1.** *Cont*.

| **Parent** | **Families** | **Avr source** | **Significant SNP**  **(LOD score 1gall / 10 gall)** | **LG** | **Genetic interpretation** |
| --- | --- | --- | --- | --- | --- |
| 16 | 438, 442, 460, 470 | 1 Gall / 10 Gall | CL1603Contig1-04-181  (10.35 / 5.01) | - | High LOD scores indicate linkage to *Fr* gene(s), but none of the SNPs have been mapped. |
| 17 | 400, 401, 416, 436, 442 | 10 Gall | 0-11-01-443  (1.40 / 4.55) | - | Parent 17 is known to segregate for *Fr1* (1 and 10 gall are avirulent to *Fr1*) |
| 1 Gall / 10 Gall | CL3041Contig1-07-362  (4.70 / 6.95) | - |
| 1 Gall / 10 Gall | 2-7562-01-464  (10.89 / 10.07) | 2 |
| 18 | 400, 422, 427, 430, 460, 471 | 1 Gall | 0-1682-01-74  (7.59 / 3.96) | - | Parent 18 is a known testcross that lacks *Fr1*. LG2 associations appear due to family 400 shared with parent 17, and family 430 shared with parent 20. |
| 1 Gall / 10 Gall | 2-7562-01-464  (7.69 / 7.29) | 2 |
| 19 | 401, 413, 422, 457 | 10 Gall | 0-11-01-443  (1.63 / 4.89) | - | Parent 19 is a known testcross that lacks *Fr1*. LG2 associations appear due to family 401 shared with parent 17. |
| 1 Gall / 10 Gall | 2-7562-01-464  (4.14 / 5.37) | 2 |
| 20 | 408, 429, 430, 457, 461, 476, 477 | 1 Gall | 2-4660-01-353  (6.07 / 2.76) | - | LG2 data suggest segregation for *Fr1*, or non-*Fr1* linked to *Fr1* (1 and 10 gall avirulent). |
| 1 Gall / 10 Gall | 0-1682-01-74  (9.58 / 15.78) | - |
| 1 Gall / 10 Gall | 2-7562-01-464  (8.91 / 15.78) | 2 |
| 21 | 413, 429, 467 | **-** | **-** | **-** | No avirulence to segregating *Fr* gene. |
| 22 | 403, 408, 420, 451 | 1 Gall | 2-7562-01-464  (6.57 / 1.21) | 2 | LG2 data suggest segregation for non-*Fr1* linked to *Fr1* (1 gall avirulent). |
| 23 | 420, 443, 448, 455, 467, 473 | 10 Gall | 0-13348-01-203  (2.81 / 4.08) | 11 | Parent 23 known *Fr10/fr10*(appears 10 gall is avirulent to *Fr10*). |
| 24 | 451, 455, 462 | - | - | - | No avirulence to segregating *Fr* gene. |
| 25 | 409, 431, 443, 462, 466 | - | - | - | No avirulence to segregating *Fr* gene. |

**Table 1.** *Cont*.

| **Parent** | **Families** | **Avr source** | **Significant SNP**  **(LOD score 1gall / 10 gall)** | **LG** | **Genetic interpretation** |
| --- | --- | --- | --- | --- | --- |
| 26 | 409, 432, 452, 474 | - | - | - | No avirulence to segregating *Fr* gene. |
| 27 | 421, 431, 432, 454 | 10 Gall | 0-17239-01-125  (1.49 / 4.30) | - |  |
| 28 | 402, 421, 433, 452, 453, 475 | 1 Gall | 0-881-01-114  (5.97 / -1.06) | - | LG10 data suggest segregation for non-*Fr8* linked to *Fr8* (1 gall avirulent). |
| 1 Gall | CL3925Contig1-03-163  (6.37 / -0.63) | 10 |
| 29 | 402, 403 | 1 Gall / 10 Gall | 2-1850-02-320  (4.19 / 7.89 | - | LG12 data suggest segregation for a new *Fr* gene on LG12. |
| 1 Gall / 10 Gall | 0-9922-01-75  (5.15 / 5.39) | 12 |
| 1 Gall / 10 Gall | 2-1850-02-320  (4.19 / 7.89) | - |
| 1 Gall / 10 Gall | CL2223Contig1-01-446 (4.19 / 4.44) | - |
| 30 | 412, 453 | - | - | - | No avirulence to segregating *Fr* gene. |
| 31 | 404 | - | - | - | Insufficient data. |
| 32 | 404, 461 | - | - | - | Parent 32 is known *Fr8/fr8*. Appears neither 1 nor 10 gall are avirulent to *Fr8*. |
| 33 | 472 | - | - | - | Insufficient data. |
| 34 | 474 | - | - | - | Insufficient data. |
| 35 | 475 | - | - | - | Insufficient data. |
| 36 | 476 | - | - | - | Insufficient data. |

**Table S2.** Mean one gall scores and corresponding standard errors of each genotypic class for each significant SNP obtained with BAMD at 95% confidence or greater. The number of clones and individual trees in the population are also shown. Missing genotypes are denoted as “--”.

| **SNP ID** | **Genotype** | **Mean**  **1 gall score** | **Std Err**  **1 gall score** | **N clones** | **N**  **trees** |
| --- | --- | --- | --- | --- | --- |
| 0-11531-01-379 | -- | 0.19 | 0.07 | 8 | 32 |
| AA | 0.20 | 0.01 | 184 | 786 |
| AG | 0.35 | 0.02 | 200 | 780 |
| GG | 0.37 | 0.03 | 75 | 295 |
| 0-18317-01-495 | -- | 0.27 | 0.06 | 16 | 62 |
| CC | 0.35 | 0.03 | 74 | 290 |

**Table S2.** *Cont.*

| **SNP ID** | **Genotype** | **Mean**  **1 gall score** | **Std Err**  **1 gall score** | **N clones** | **N**  **trees** |
| --- | --- | --- | --- | --- | --- |
| 0-18317-01-495 | TC | 0.36 | 0.02 | 199 | 777 |
| TT | 0.20 | 0.01 | 178 | 764 |
| 0-18317-01-77 | -- | 0.22 | 0.06 | 10 | 46 |
| CC | 0.20 | 0.01 | 179 | 764 |
| CG | 0.35 | 0.02 | 206 | 803 |
| GG | 0.38 | 0.03 | 72 | 280 |
| 0-3780-02-367 | -- | 0.02 | 0.02 | 12 | 53 |
| AA | 0.26 | 0.02 | 162 | 641 |
| AG | 0.30 | 0.02 | 226 | 928 |
| GG | 0.37 | 0.03 | 67 | 271 |
| 0-7752-01-164 | -- | 0.28 | 0.08 | 9 | 36 |
| AA | 0.43 | 0.03 | 68 | 240 |
| AT | 0.30 | 0.02 | 231 | 932 |
| TT | 0.22 | 0.02 | 159 | 685 |
| 0-881-01-114 | -- | 0.23 | 0.04 | 21 | 91 |
| AA | 0.30 | 0.05 | 24 | 98 |
| AG | 0.40 | 0.02 | 141 | 559 |
| GG | 0.24 | 0.01 | 281 | 1145 |
| 0-8972-01-135 | -- | 0.33 | 0.04 | 32 | 130 |
| CC | 0.18 | 0.02 | 108 | 462 |
| TC | 0.33 | 0.02 | 207 | 818 |
| TT | 0.32 | 0.02 | 120 | 483 |
| 0-9379-01-192 | -- | 0.13 | 0.06 | 9 | 38 |
| CC | 0.05 | 0.02 | 29 | 106 |
| TC | 0.25 | 0.01 | 213 | 885 |
| TT | 0.37 | 0.02 | 216 | 864 |
| 2-1850-02-320 | -- | 0.27 | 0.03 | 73 | 304 |
| CC | 0.19 | 0.02 | 113 | 462 |
| GC | 0.29 | 0.02 | 186 | 748 |
| GG | 0.43 | 0.03 | 95 | 379 |
| 2-4660-01-353 | -- | 0.23 | 0.06 | 11 | 47 |
| CC | 0.10 | 0.03 | 37 | 147 |
| CG | 0.26 | 0.02 | 131 | 524 |
| GG | 0.33 | 0.01 | 288 | 1175 |
| 2-7562-01-464 | -- | 0.45 | 0.03 | 52 | 218 |
| CC | 0.20 | 0.02 | 147 | 610 |
| CG | 0.31 | 0.01 | 268 | 1065 |
| GG | - | - | 0 | 0 |
| CL1603Contig1-04-181 | -- | 0.23 | 0.07 | 10 | 43 |
| CC | - | - | 0 | 0 |

**Table S2.** *Cont.*

| **SNP ID** | **Genotype** | **Mean**  **1 gall score** | **Std Err**  **1 gall score** | **N clones** | **N**  **trees** |
| --- | --- | --- | --- | --- | --- |
| CL1603Contig1-04-181 | TC | 0.07 | 0.02 | 29 | 104 |
| TT | 0.31 | 0.01 | 427 | 1741 |
| CL3925Contig1-03-163 | -- | 0.06 | 0.04 | 7 | 35 |
| AA | - | - | 0 | 0 |
| AG | 0.55 | 0.04 | 50 | 196 |
| GG | 0.26 | 0.01 | 410 | 1662 |
| UMN-6874-01-769 | -- | 0.20 | 0.06 | 10 | 46 |
| AA | 0.17 | 0.03 | 27 | 121 |
| AC | 0.23 | 0.02 | 171 | 701 |
| CC | 0.35 | 0.01 | 259 | 1025 |
| UMN-CL78Contig1-01-192 | -- | 0.42 | 0.04 | 24 | 192 |
| AA | 0.64 | 0.09 | 3 | 28 |
| AT | 0.32 | 0.01 | 286 | 2254 |
| TT | 0.21 | 0.01 | 160 | 1312 |

**Table S3.** Mean 10 gall scores and corresponding standard errors of each genotypic class for each significant SNP obtained with BAMD at 95% confidence or greater. The number of clones and individual trees in the population are also shown. Missing genotypes are denoted as “--”.

| **Label** | **Data** | **Mean**  **10Gall score** | **Std Err**  **10Gall score** | **N clones** | **N**  **trees** |
| --- | --- | --- | --- | --- | --- |
| 0-11-01-443 | -- | 0.21 | 0.05 | 15 | 62 |
| CC | 0.52 | 0.08 | 10 | 42 |
| TC | 0.42 | 0.02 | 143 | 595 |
| TT | 0.33 | 0.01 | 658 | 2768 |
| 0-11443-01-656 | -- | 0.34 | 0.05 | 27 | 111 |
| AA | 0.37 | 0.01 | 626 | 2644 |
| AG | 0.25 | 0.02 | 162 | 667 |
| GG | 0.20 | 0.06 | 11 | 45 |
| 0-13348-01-203 | -- | 0.24 | 0.05 | 18 | 76 |
| AA | 0.49 | 0.04 | 36 | 147 |
| AG | 0.42 | 0.02 | 243 | 996 |
| GG | 0.31 | 0.01 | 529 | 2248 |
| 0-13650-01-203 | -- | 0.37 | 0.04 | 31 | 132 |
| GG | 0.31 | 0.01 | 522 | 2183 |
| TG | 0.41 | 0.02 | 239 | 1008 |
| TT | 0.47 | 0.04 | 34 | 144 |
| 0-1682-01-74 | -- | 0.45 | 0.06 | 16 | 60 |
| CC | 0.27 | 0.01 | 433 | 1837 |

**Table S3.** *Cont*.

| **Label** | **Data** | **Mean**  **10Gall score** | **Std Err**  **10Gall score** | **N clones** | **N**  **trees** |
| --- | --- | --- | --- | --- | --- |
| 0-1682-01-74 | TC | 0.42 | 0.01 | 316 | 1329 |
| TT | 0.48 | 0.03 | 61 | 241 |
| 0-17239-01-125 | -- | 0.29 | 0.05 | 19 | 82 |
| CC | 0.31 | 0.01 | 229 | 958 |
| TC | 0.33 | 0.01 | 430 | 1810 |
| TT | 0.46 | 0.02 | 148 | 617 |
| 0-2040-01-149 | -- | 0.27 | 0.05 | 23 | 89 |
| CC | 0.41 | 0.01 | 293 | 1199 |
| TC | 0.33 | 0.01 | 414 | 1752 |
| TT | 0.25 | 0.02 | 96 | 427 |
| 0-3634-02-202 | -- | 0.35 | 0.03 | 53 | 222 |
| AA | 0.31 | 0.01 | 471 | 2000 |
| AC | 0.40 | 0.01 | 302 | 1245 |
| CC | - | - | 0 | 0 |
| 0-4172-02-205 | -- | 0.31 | 0.03 | 72 | 301 |
| GG | 0.26 | 0.02 | 196 | 833 |
| TG | 0.36 | 0.01 | 392 | 1618 |
| TT | 0.42 | 0.02 | 166 | 715 |
| 0-4442-02-50 | -- | 0.42 | 0.08 | 10 | 38 |
| AA | 0.60 | 0.07 | 11 | 50 |
| AG | 0.42 | 0.02 | 164 | 698 |
| GG | 0.32 | 0.01 | 641 | 2681 |
| 0-9922-01-75 | -- | 0.35 | 0.04 | 28 | 121 |
| CC | 0.44 | 0.02 | 133 | 530 |
| TC | 0.33 | 0.01 | 371 | 1564 |
| TT | 0.32 | 0.01 | 294 | 1252 |
| 2-1563-02-244 | -- | 0.35 | 0.03 | 72 | 297 |
| GG | 0.38 | 0.01 | 319 | 1345 |
| TG | 0.31 | 0.01 | 380 | 1585 |
| TT | 0.37 | 0.03 | 55 | 240 |
| 2-1850-02-320 | -- | 0.35 | 0.02 | 125 | 511 |
| CC | 0.23 | 0.01 | 194 | 839 |
| GC | 0.34 | 0.01 | 329 | 1380 |
| GG | 0.48 | 0.02 | 178 | 737 |
| 2-5724-02-427 | -- | 0.39 | 0.07 | 12 | 49 |
| CC | 0.37 | 0.01 | 356 | 1483 |
| CG | 0.34 | 0.01 | 360 | 1510 |
| GG | 0.27 | 0.02 | 98 | 425 |
| 2-7562-01-464 | -- | 0.46 | 0.03 | 89 | 369 |
| CC | 0.25 | 0.01 | 245 | 1055 |

**Table S3.** *Cont*.

| **Label** | **Data** | **Mean**  **10Gall score** | **Std Err**  **10Gall score** | **N clones** | **N**  **trees** |
| --- | --- | --- | --- | --- | --- |
|  | CG | 0.37 | 0.01 | 491 | 2039 |
| GG | 0.75 | 0.25 | 1 | 4 |
| CL2223Contig1-01-446 | -- | 0.26 | 0.05 | 21 | 93 |
| CC | 0.37 | 0.01 | 564 | 2408 |
| GC | 0.30 | 0.02 | 219 | 868 |
| GG | 0.20 | 0.04 | 22 | 98 |
| CL229Contig1-03-72 | -- | 0.46 | 0.03 | 54 | 222 |
| AA | 0.25 | 0.02 | 91 | 373 |
| AC | 0.30 | 0.01 | 383 | 1616 |
| CC | 0.41 | 0.01 | 298 | 1256 |
| Label | Data | Mean  10Gall score | Std Err  10Gall score | N clones | N  trees |
| CL3041Contig1-07-362 | -- | 0.38 | 0.02 | 132 | 565 |
| AA | 0.23 | 0.02 | 167 | 717 |
| AG | 0.37 | 0.01 | 410 | 1721 |
| GG | 0.39 | 0.02 | 117 | 464 |
| CL996Contig1-03-66 | -- | 0.31 | 0.05 | 13 | 102 |
| AA | 0.43 | 0.02 | 86 | 724 |
| AG | 0.36 | 0.01 | 374 | 3112 |
| GG | 0.31 | 0.01 | 353 | 2996 |
| UMN-6874-01-769 | -- | 0.48 | 0.07 | 13 | 56 |
| AA | 0.26 | 0.03 | 47 | 210 |
| AC | 0.29 | 0.01 | 302 | 1256 |
| CC | 0.39 | 0.01 | 464 | 1945 |
| UMN-CL78Contig1-01-192 | -- | 0.45 | 0.04 | 49 | 198 |
| AA | 0.67 | 0.11 | 6 | 21 |
| AT | 0.35 | 0.01 | 503 | 2100 |
| TT | 0.31 | 0.01 | 268 | 1148 |
